# Supplementary material
Source: PubMed Central journal article supplement (PMC5607377)

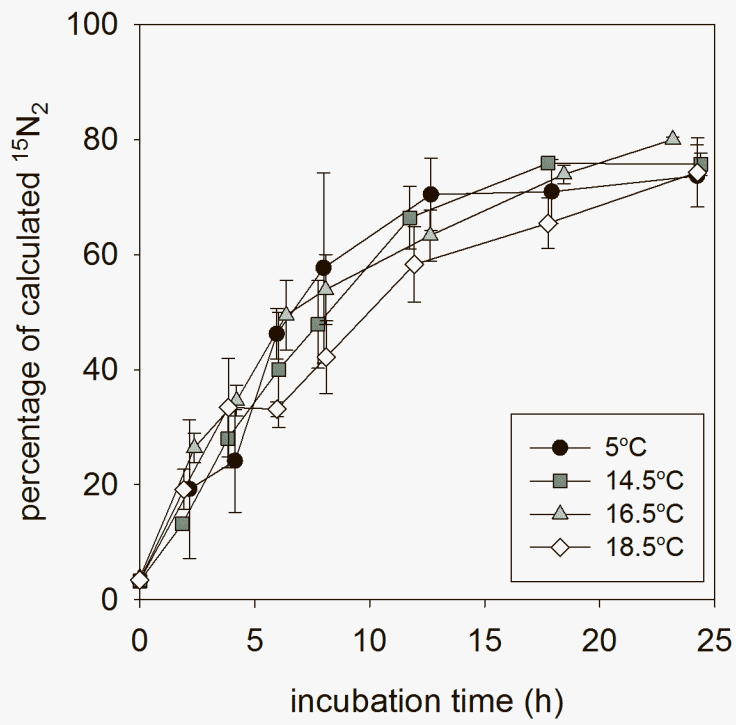

Supplement: ismej201797x2.pdf [file ismej201797x2.pdf]
